# Supplementary material
Source: publisher figshare collection journal article supplement (https://gsajournals.figshare.com/ndownloader/files/29162145)
Supplement: Supplementary file 1 [file 29162145]

## Sheet: FLW
QTL Id	Publication	Population	Trait Description	LG	Start	End (v2.1)	Genes Under QTL (v2.1)
QDTFL1.1	Mace, Hunt & Jordan 2013	Nested Association Mapping set	Days to flowering	1	3939417	4710917	99
QDTFL1.58	Bouchet et al 2017	Nested Association Mapping set US	Days to flowering	1	4041160	4749571	95
QDTFL1.3	Kebede et al 2001	SC56/Tx7000	Days to flowering	1	5145091	7441087	291
QDTFL1.2	Wang et al 2014a	IS8525/R931945-2-2	Days to flowering	1	5162468	6819383	196
QDTFL1.4	Sangma 2013	R931945-2-2*2/S. bicolor subsp. verticilliflorum	Days to flowering	1	6748614	8506826	226
QDTFL1.6	Nagaraja Reddy et al 2013	M35-1/B35	Days to flowering	1	6962631	13176764	707
QDTFL1.5	Mannai et al 2011	Diversity research set (n=107)	Days to flowering	1	8916561	9846319	115
QDTFL1.7	Nagaraja Reddy et al 2013	M35-1/B35	Days to flowering	1	11252457	12868975	177
QDTFL1.8	Crasta et al 1999	B35/Tx430	Days to flowering	1	14699330	21648208	514
QDTFL1.12	Sangma 2013	R931945-2-2*2/S. bicolor subsp. verticilliflorum	Days to flowering	1	23709346	53434930	824
QDTFL1.57	Sukumaran et al 2016	Tx436/00MN7645	Days to flowering	1	23794853	47465889	436
QDTFL1.10	Felderhoff et al 2012	BTx3197/Rio	Days to flowering	1	23798376	50562701	612
QDTFL1.9	Mace, Hunt & Jordan 2013	Nested Association Mapping set	Days to flowering	1	23809591	43694232	308
QDTFL1.49	Phuong et al 2014_ NOTE RETRACTED	HYP/DTP	Days to flowering	1	23892857	48216065	455
QDTFL1.48	Phuong et al 2014_ NOTE RETRACTED	HYP/DTP	Days to flowering	1	24048379	47730030	428
QDTFL1.51	Burrell et al 2015	BTx623/SC748-5	Days to flowering	1	24272283	44866149	326
QDTFL1.52	Burrell et al 2015	BTx623/SC748-5	Days to flowering	1	24272283	44866149	326
QDTFL1.11	Mantilla Perez et al 2014	Sorghum Association Panel (SAP)	Days to flowering	1	45640380	46410437	27
QDTFL1.36	Srinivas et al 2009	296B/IS18551	Days to flowering	1	63135592	64760761	194
QDTFL1.38	Mantilla Perez et al 2014	Sorghum Association Panel (SAP)	Days to flowering	1	65025808	65516321	46
QDTFL1.45	Sangma 2013	IS8525/R931945-2-2	Days to flowering	1	70458874	73720929	362
QDTFL1.39	Wang et al 2014a	Advanced Yield Test germplasm set	Days to flowering	1	70951819	71205610	39
QDTFL1.40	Upadhyaya et al 2013b	mini-core set	Days to flowering	1	71205610	71205611	1
QDTFL1.41	Wang et al 2014a	R931945-2-2*2/S. bicolor subsp. verticilliflorum	Days to flowering	1	71205610	73158091	227
QDTFL1.42	Wang et al 2014a	R931945-2-2*2/S. bicolor subsp. verticilliflorum	Days to flowering	1	71205610	73158091	227
QDTFL1.43	Wang et al 2014a	R931945-2-2*2/S. bicolor subsp. verticilliflorum	Days to flowering	1	71205610	73158091	227
QDTFL1.44	Sangma 2013	R931945-2-2*2/S. bicolor subsp. verticilliflorum	Days to flowering	1	71347289	71449443	19
QDTFL1.46	Mace, Hunt & Jordan 2013	Nested Association Mapping set	Days to flowering	1	72268496	72486877	27
QDTFL1.47	Upadhyaya et al 2013b	mini-core set	Days to flowering	1	72334010	72839540	52
QDTFL6.2	Takai et al 2012	MS138B/74LH3213	Days to flowering	6	0	653439	43
QDTFL6.1	Sangma 2013	IS8525/R931945-2-2	Days to flowering	6	0	686550	44
QDTFL6.4	Sangma 2013	R931945-2-2*2/S. bicolor subsp. verticilliflorum	Days to flowering	6	0	1433769	100
QDTFL6.5	Takai et al 2012	MS138B/74LH3213	Days to flowering	6	482432	1415109	71
QDTFL6.3	Upadhyaya et al 2013b	mini-core set	Days to flowering	6	495324	659464	13
QDTFL6.84	Mace and Jordan 2010		Days to flowering	6	558327	785466	14
QDTFL6.79	Bouchet et al 2017	Nested Association Mapping set US	Days to flowering	6	644441	871581	15
QDTFL6.6	Mace, Hunt & Jordan 2013	Nested Association Mapping set	Days to flowering	6	704891	1446560	57
QDTFL6.70	Sukumaran et al 2016	Tx436/00MN7645	Days to flowering	6	1641890	2901695	63
QDTFL6.10	Sangma 2013	R931945-2-2*2/S. bicolor subsp. verticilliflorum	Days to flowering	6	1695987	27199391	298
QDTFL6.7	Mace, Hunt & Jordan 2013	Nested Association Mapping set	Days to flowering	6	1847348	1941753	12
QDTFL6.8	Wang et al 2014a	R931945-2-2*2/S. bicolor subsp. verticilliflorum	Days to flowering	6	1851612	1956370	12
QDTFL6.9	Wang et al 2014a	R931945-2-2*2/S. bicolor subsp. verticilliflorum	Days to flowering	6	1851612	1956370	12
QDTFL6.68	Mocoeur et al 2015	E-Tian/Ji2731	Days to flowering	6	3322704	44137592	516
QDTFL6.12	Wang et al 2014a	IS8525/R931945-2-2	Days to flowering	6	3865299	38147857	298
QDTFL6.11	Higgins et al 2014	Families A&B: (SC673/(LandracexBTx406)), (SC757/(LandracexBTx406))	Days to flowering	6	4263553	4368637	4
QDTFL6.64	Zhang et al 2015	Diverse set	Days to flowering	6	4293677	38147949	267
QDTFL6.65	Zhang et al 2015	Diverse set	Days to flowering	6	4293677	38147949	267
QDTFL6.73	Sukumaran et al 2016	Tx436/00MN7645	Days to flowering	6	4359969	38148151	266
QDTFL6.69	Sukumaran et al 2016	Tx436/00MN7645	Days to flowering	6	4374188	38147932	265
QDTFL6.81	Bouchet et al 2017	Nested Association Mapping set US	Days to flowering	6	4389712	7696624	77
QDTFL6.71	Sukumaran et al 2016	Tx436/00MN7645	Days to flowering	6	4389738	38147945	265
QDTFL6.61	Phuong et al 2014_ NOTE RETRACTED	HYP/DTP	Days to flowering	6	4391655	20686877	149
QDTFL6.13	Mace, Hunt & Jordan 2013	Nested Association Mapping set	Days to flowering	6	9845437	38147857	173
QDTFL6.15	Sangma 2013	IS8525/R931945-2-2	Days to flowering	6	18222542	38148022	123
QDTFL6.14	Mace, Hunt & Jordan 2013	Nested Association Mapping set	Days to flowering	6	19045124	23226800	6
QDTFL6.83	Cuevas et al 2016		Days to flowering	6	28378622	38147874	96
QDTFL6.39	Felderhoff et al 2012	BTx3197/Rio	Days to flowering	6	38147857	45885959	292
QDTFL6.16	Higgins et al 2014	Families A&B&C: (SC673/(LandracexBTx406)), (SC757/(LandracexBTx406)), (SC1203/(LandracexBTx406))	Days to flowering	6	38147864	38147940	0
QDTFL6.17	Higgins et al 2014	Families A&B&C&D: (SC673/(LandracexBTx406)), (SC757/(LandracexBTx406)), (SC1203/(LandracexBTx406)), (SC1038/(LandracexBTx406))	Days to flowering	6	38147864	38147940	0
QDTFL6.18	Higgins et al 2014	Families A&B&C&D&E: (SC673/(LandracexBTx406)), (SC757/(LandracexBTx406)), (SC1203/(LandracexBTx406)), (SC1038/(LandracexBTx406)), (SC991/(LandracexBTx406))	Days to flowering	6	38147864	38147940	0
QDTFL6.19	Higgins et al 2014	FamilyC: SC1203/(LandracexBTx406)	Days to flowering	6	38148024	38148099	0
QDTFL6.20	Higgins et al 2014	Families A&B&C: (SC673/(LandracexBTx406)), (SC757/(LandracexBTx406)), (SC1203/(LandracexBTx406))	Days to flowering	6	38148024	38148099	0
QDTFL6.21	Higgins et al 2014	Families A&B: (SC673/(LandracexBTx406)), (SC757/(LandracexBTx406))	Days to flowering	6	38148025	38148100	0
QDTFL6.22	Higgins et al 2014	FamilyB: SC757/(LandracexBTx406)	Days to flowering	6	38148025	38148101	0
QDTFL6.23	Higgins et al 2014	Families A&B&C: (SC673/(LandracexBTx406)), (SC757/(LandracexBTx406)), (SC1203/(LandracexBTx406))	Days to flowering	6	38148033	38148108	0
QDTFL6.24	Higgins et al 2014	Families A&B&C&D: (SC673/(LandracexBTx406)), (SC757/(LandracexBTx406)), (SC1203/(LandracexBTx406)), (SC1038/(LandracexBTx406))	Days to flowering	6	38148033	38148108	0
QDTFL6.25	Higgins et al 2014	FamilyE: SC991/(LandracexBTx406)	Days to flowering	6	38148042	38148117	0
QDTFL6.26	Higgins et al 2014	Families A&B&C&D&E: (SC673/(LandracexBTx406)), (SC757/(LandracexBTx406)), (SC1203/(LandracexBTx406)), (SC1038/(LandracexBTx406)), (SC991/(LandracexBTx406))	Days to flowering	6	38148042	38148117	0
QDTFL6.66	Zhang et al 2015	Diverse set	Days to flowering	6	38148084	46382058	334
QDTFL6.67	Zhang et al 2015	Diverse set	Days to flowering	6	38148084	46382058	334
QDTFL6.27	Higgins et al 2014	FamilyD: SC1038/(LandracexBTx406)	Days to flowering	6	38148093	38148168	0
QDTFL6.28	Higgins et al 2014	Families A&B&C&D: (SC673/(LandracexBTx406)), (SC757/(LandracexBTx406)), (SC1203/(LandracexBTx406)), (SC1038/(LandracexBTx406))	Days to flowering	6	38148093	38148168	0
QDTFL6.42	Felderhoff et al 2012	BTx3197/Rio	Days to flowering	6	38148105	45894706	293
QDTFL6.29	Lin et al 1995	BTx623/S. propinquum	Days to flowering	6	38148133	41883340	109
QDTFL6.75	Bai et al 2017	BTx623/Rio	Days to flowering	6	38148144	42517229	139
QDTFL6.78	Bouchet et al 2017	Nested Association Mapping set US	Days to flowering	6	38148171	41783276	105
QDTFL6.76	Bai et al 2017	BTx623/Rio	Days to flowering	6	38148171	42429167	130
QDTFL6.43	Felderhoff et al 2012	BTx3197/Rio	Days to flowering	6	38148201	45865168	290
QDTFL6.31	Zou et al 2012	654/LTR108	Days to flowering	6	38148202	42517555	139
QDTFL6.30	Upadhyaya et al 2012b	mini-core set	Days to flowering	6	41607245	42235153	20
QDTFL6.80	Bouchet et al 2017	Nested Association Mapping set US	Days to flowering	6	41609414	42237322	20
QDTFL6.82	Murphy et al 2011		Days to flowering	6	41629426	42257333	21
QDTFL6.37	Zou et al 2012	654/LTR108	Days to flowering	6	41645415	44078471	97
QDTFL6.38	Ritter et al 2008	R9188/R9403463-2-1	Days to flowering	6	41719125	44118639	91
QDTFL6.32	Higgins et al 2014	Families A&B&C&D&E: (SC673/(LandracexBTx406)), (SC757/(LandracexBTx406)), (SC1203/(LandracexBTx406)), (SC1038/(LandracexBTx406)), (SC991/(LandracexBTx406))	Days to flowering	6	41787351	42415259	25
QDTFL6.33	Higgins et al 2014	Families A&B&C&D: (SC673/(LandracexBTx406)), (SC757/(LandracexBTx406)), (SC1203/(LandracexBTx406)), (SC1038/(LandracexBTx406))	Days to flowering	6	41883183	42492707	29
QDTFL6.77	Bouchet et al 2017	Nested Association Mapping set US	Days to flowering	6	41908365	42497106	29
QDTFL6.34	Higgins et al 2014	Families A&B: (SC673/(LandracexBTx406)), (SC757/(LandracexBTx406))	Days to flowering	6	42073993	42526040	25
QDTFL6.35	Higgins et al 2014	Families A&B&C: (SC673/(LandracexBTx406)), (SC757/(LandracexBTx406)), (SC1203/(LandracexBTx406))	Days to flowering	6	42073993	42526040	25
QDTFL6.40	Kebede et al 2001	SC56/Tx7000	Days to flowering	6	42098742	44177909	83
QDTFL6.36	Higgins et al 2014	FamilyA: SC673/(LandracexBTx406)	Days to flowering	6	42163741	42541718	26
QDTFL6.41	Higgins et al 2014	Families A&B&C&D&E: (SC673/(LandracexBTx406)), (SC757/(LandracexBTx406)), (SC1203/(LandracexBTx406)), (SC1038/(LandracexBTx406)), (SC991/(LandracexBTx406))	Days to flowering	6	44048921	44198810	4
QDTFL6.45	Feltus et al 2006	BTx623/IS3620C	Days to flowering	6	44062474	46142262	124
QDTFL6.44	Upadhyaya et al 2013b	mini-core set	Days to flowering	6	44279649	44429538	10
QDTFL10.10	Wang et al 2014a	ICSV745/R890562-1-2	Days to flowering	10	7644737	9728104	147
QDTFL10.13	Felderhoff et al 2012	BTx3197/Rio	Days to flowering	10	8338042	50563835	786
QDTFL10.38	Mocoeur et al 2015	E-Tian/Ji2731	Days to flowering	10	8539280	51675643	844
QDTFL10.22	Nagaraja Reddy et al 2013	M35-1/B35	Days to flowering	10	8825003	50784147	764
QDTFL10.14	Parh 2005	IS8525/R931945-2-2	Days to flowering	10	9025553	49477262	683
QDTFL10.16	Phuong et al 2013	IS2449/IS1488	Days to flowering	10	10087485	49006689	610
QDTFL10.15	Crasta et al 1999	B35/Tx430	Days to flowering	10	10262180	41649453	398
QDTFL10.17	Phuong et al 2013	IS2449/IS1488	Days to flowering	10	10272961	48971072	600
QDTFL10.25	Mace, Hunt & Jordan 2013	Nested Association Mapping set	Days to flowering	10	10398912	51404080	713
QDTFL10.39	Bouchet et al 2017	Nested Association Mapping set US	Days to flowering	10	10573940	13512569	121
QDTFL10.35	Phuong et al 2013	IS2449/IS1488	Days to flowering	10	10579822	49252024	596
QDTFL10.23	Phuong et al 2013	IS2449/IS1488	Days to flowering	10	12884439	50032728	534
QDTFL10.24	Wang et al 2014a	IS8525/R931945-2-2	Days to flowering	10	12994401	50372034	538
QDTFL10.36	Phuong et al 2013	IS2449/IS1488	Days to flowering	10	13518090	49511011	487
QDTFL10.18	Sangma 2013	R931945-2-2*2/S. bicolor subsp. verticilliflorum	Days to flowering	10	13887678	41649453	252
QDTFL10.19	Wang et al 2014a	R931945-2-2*2/S. bicolor subsp. verticilliflorum	Days to flowering	10	13887678	41649453	252
QDTFL10.20	Wang et al 2014a	R931945-2-2*2/S. bicolor subsp. verticilliflorum	Days to flowering	10	13887678	41649453	252
QDTFL10.21	Wang et al 2014a	R931945-2-2*2/S. bicolor subsp. verticilliflorum	Days to flowering	10	13887678	41649453	252
QDTFL10.26	Sangma 2013	IS8525/R931945-2-2	Days to flowering	10	42087060	51724250	331
QDTFL10.27	Wang et al 2014a	Advanced Yield Test germplasm set	Days to flowering	10	50029770	50033562	2
QDTFL10.28	Upadhyaya et al 2012b	mini-core set	Days to flowering	10	50033186	50283194	8
QDTFL10.29	Wang et al 2014a	R931945-2-2*2/S. bicolor subsp. verticilliflorum	Days to flowering	10	53732208	54062316	35
QDTFL10.30	Wang et al 2014a	R931945-2-2*2/S. bicolor subsp. verticilliflorum	Days to flowering	10	53732208	54062316	35
QDTFL10.31	Wang et al 2014a	R931945-2-2*2/S. bicolor subsp. verticilliflorum	Days to flowering	10	53732208	54062316	35
QDTFL10.37	Zhao et al 2016	Sorghum Association Panel (SAP)	Days to flowering	10	54298777	54349211	9
QDTFL10.32	Hart et al 2001	BTx623/IS3620C	Days to flowering	10	55933163	58813806	323
QDTFL10.33	Nagaraja Reddy et al 2013	M35-1/B35	Days to flowering	10	56440375	59262339	321
QDTFL10.34	Parh 2005	IS8525/R931945-2-2	Days to flowering	10	59099683	59900654	107

## Sheet: HGH
QTL Id	Publication	Population	Trait Description	LG	Start	End (v2.1)	Genes Under QTL (v2.1)
QHGHT1.23	Wang et al 2016	Shihong137/L-Tian	Height (plant height)	1	55298047	57891572	244
QHGHT1.10	Sakhi et al 2013	Diversity research set (n=107)	Height (plant height)	1	58698779	59069315	37
QHGHT1.11	Sakhi et al 2013	Diversity research set (n=107)	Height (plant height)	1	58698779	59069315	37
QHGHT1.29	Boyles et al 2017	BTxARG-1/PI656056	Height (plant height)	1	60609858	64081943	427
QHGHT1.12	Shiringani et al 2010	M71/SS79	Height (plant height)	1	60654229	63301999	327
QHGHT1.24	Wang et al 2016	Shihong137/L-Tian	Height (plant height)	1	60819920	65062245	521
QHGHT1.25	Wang et al 2016	Shihong137/L-Tian	Height (plant height)	1	60859577	64856991	485
QHGHT1.13	Rami et al 1998	IS2807/379	Height (plant height)	1	62663902	64250540	187
QHGHT1.26	Wang et al 2016	Shihong137/L-Tian	Height (plant height)	1	62804946	64212530	165
QHGHT1.21	Mocoeur et al 2015	E-Tian/Ji2731	Height (plant height)	1	62905912	67021959	488
QHGHT1.15	Feltus et al 2006	BTx623/IS3620C	Height (plant height)	1	62943012	65057696	255
QHGHT1.14	Hart et al 2001	BTx623/IS3620C	Height (plant height)	1	63019478	64678167	196
QHGHT1.17	Wang et al 2014a	IS8525/R931945-2-2	Height (plant height)	1	67630115	71205610	420
QHGHT1.16	Kebede et al 2001	SC56/Tx7000	Height (plant height)	1	67912542	68421750	67
QHGHT1.18	Lin et al 1995	BTx623/S. propinquum	Height (plant height)	1	68245684	73720929	618
QHGHT1.19	Parh 2005	IS8525/R931945-2-2	Height (plant height)	1	70488064	73720929	358
QHGHT3.11	Lin et al 1995	BTx623/S. propinquum	Height (plant height)	3	58322201	62576901	495
QHGHT3.17	Bai et al 2017	BTx623/Rio	Height (plant height)	3	58760812	62450482	433
QHGHT3.14	Phuong et al 2013	IS2449/IS1488	Height (plant height)	3	60594988	63610269	377
QHGHT3.15	Wang et al 2014a	ICSV745/R890562-1-2	Height (plant height)	3	60970587	65332838	543
QHGHT3.12	Wang et al 2014a	R931945-2-2*2/S. bicolor subsp. verticilliflorum	Height (plant height)	3	61053462	61467833	44
QHGHT3.13	Wang et al 2014a	R931945-2-2*2/S. bicolor subsp. verticilliflorum	Height (plant height)	3	61053462	61467833	44
QHGHT3.21	Harris-Shultz et al 2015	HoneyDrip/Collier	Height (plant height)	3	65403629	68917532	456
QHGHT3.18	Bai et al 2017	BTx623/Rio	Height (plant height)	3	65438162	69231000	491
QHGHT3.20	Harris-Shultz et al 2015	HoneyDrip/Collier	Height (plant height)	3	67050682	67661412	83
QHGHT3.19	Bouchet et al 2017	Nested Association Mapping set US	Height (plant height)	3	69615828	69817828	32
QHGHT3.16	Nagaraja Reddy et al 2013	M35-1/B35	Height (plant height)	3	69952643	72883327	369
QHGHT6.5	Brown et al 2006	BTx623/IS3620C	Height (plant height)	6	3119684	14618590	192
QHGHT6.6	Feltus et al 2006	BTx623/IS3620C	Height (plant height)	6	3438628	20618068	198
QHGHT6.14	Felderhoff et al 2012	BTx3197/Rio	Height (plant height)	6	4190457	45839953	562
QHGHT6.84	Bai et al 2017	BTx623/Rio	Height (plant height)	6	4230968	45959545	575
QHGHT6.79	Zhang et al 2015	Diverse set	Height (plant height)	6	4274091	38148017	269
QHGHT6.87	Bouchet et al 2017	Nested Association Mapping set US	Height (plant height)	6	4348934	5830916	30
QHGHT6.9	Nagaraja Reddy et al 2013	M35-1/B35	Height (plant height)	6	4349876	21284586	150
QHGHT6.7	Wang et al 2012	mini-core set	Height (plant height)	6	4390349	7725782	78
QHGHT6.8	Wang et al 2012	mini-core set	Height (plant height)	6	4390349	7725782	78
QHGHT6.10	Higgins et al 2014	Families A&B&C&D&E: (SC673/(LandracexBTx406)), (SC757/(LandracexBTx406)), (SC1203/(LandracexBTx406)), (SC1038/(LandracexBTx406)), (SC991/(LandracexBTx406))	Height (plant height)	6	17582583	21764259	8
QHGHT6.89	Yamaguchi et al 2016	bmr-6/SIL-05	Height (plant height)	6	22408246	44103224	311
QHGHT6.12	Lin et al 1995	BTx623/S. propinquum	Height (plant height)	6	24034014	38147918	114
QHGHT6.11	Higgins et al 2014	Families A&B&C: (SC673/(LandracexBTx406)), (SC757/(LandracexBTx406)), (SC1203/(LandracexBTx406))	Height (plant height)	6	24591008	28772684	19
QHGHT6.83	Zhao et al 2016	Sorghum Association Panel (SAP)	Height (plant height)	6	27795820	38147864	100
QHGHT6.91	Gelli et al 2016	CK60/China17	Height (plant height)	6	38147987	44484280	213
QHGHT6.15	Higgins et al 2014	FamilyC: SC1203/(LandracexBTx406)	Height (plant height)	6	38148024	38148099	0
QHGHT6.16	Higgins et al 2014	FamilyA: SC673/(LandracexBTx406)	Height (plant height)	6	38148025	38148100	0
QHGHT6.18	Ritter et al 2008	R9188/R9403463-2-1	Height (plant height)	6	38148034	42074710	115
QHGHT6.22	Zou et al 2012	654/LTR108	Height (plant height)	6	38148042	44082890	195
QHGHT6.25	Zou et al 2012	654/LTR108	Height (plant height)	6	38148051	44276607	200
QHGHT6.17	Higgins et al 2014	Families A&B&C&D: (SC673/(LandracexBTx406)), (SC757/(LandracexBTx406)), (SC1203/(LandracexBTx406)), (SC1038/(LandracexBTx406))	Height (plant height)	6	38148068	38148144	0
QHGHT6.20	Feltus et al 2006	BTx623/S. propinquum	Height (plant height)	6	38148144	42413680	129
QHGHT6.73	Burrell et al 2015	BTx623/SC748-5	Height (plant height)	6	38148146	44159686	198
QHGHT6.78	Burrell et al 2015	BTx623/SC748-5	Height (plant height)	6	38148146	44159686	198
QHGHT6.19	Higgins et al 2014	FamilyD: SC1038/(LandracexBTx406)	Height (plant height)	6	38148154	41644139	98
QHGHT6.81	Zhang et al 2015	Diverse set	Height (plant height)	6	38148185	48764154	577
QHGHT6.82	Zhao et al 2016	Sorghum Association Panel (SAP)	Height (plant height)	6	38148193	41966854	111
QHGHT6.21	Upadhyaya et al 2012b	mini-core set	Height (plant height)	6	41607245	42235153	20
QHGHT6.23	Higgins et al 2014	Families A&B&C&D&E: (SC673/(LandracexBTx406)), (SC757/(LandracexBTx406)), (SC1203/(LandracexBTx406)), (SC1038/(LandracexBTx406)), (SC991/(LandracexBTx406))	Height (plant height)	6	41787351	42415259	25
QHGHT6.24	Higgins et al 2014	Families A&B&C&D&E: (SC673/(LandracexBTx406)), (SC757/(LandracexBTx406)), (SC1203/(LandracexBTx406)), (SC1038/(LandracexBTx406)), (SC991/(LandracexBTx406))	Height (plant height)	6	41883183	42492707	29
QHGHT6.47	Felderhoff et al 2012	BTx3197/Rio	Height (plant height)	6	42153579	46943517	268
QHGHT6.80	Zhang et al 2015	Diverse set	Height (plant height)	6	42274091	48764154	458
QHGHT6.26	Higgins et al 2014	Families A&B&C: (SC673/(LandracexBTx406)), (SC757/(LandracexBTx406)), (SC1203/(LandracexBTx406))	Height (plant height)	6	42276359	42561391	23
QHGHT6.27	Higgins et al 2014	Families A&B&C&D: (SC673/(LandracexBTx406)), (SC757/(LandracexBTx406)), (SC1203/(LandracexBTx406)), (SC1038/(LandracexBTx406))	Height (plant height)	6	42276359	42561391	23
QHGHT6.28	Higgins et al 2014	FamilyE: SC991/(LandracexBTx406)	Height (plant height)	6	42310697	42567389	19
QHGHT6.86	Bouchet et al 2017	Nested Association Mapping set US	Height (plant height)	6	42380986	42579668	16
QHGHT6.92	Hilley et al 2017		Height (plant height)	6	42414004	42585436	15
QHGHT6.29	Higgins et al 2014	Families A&B&C: (SC673/(LandracexBTx406)), (SC757/(LandracexBTx406)), (SC1203/(LandracexBTx406))	Height (plant height)	6	42432304	42588633	14
QHGHT6.30	Higgins et al 2014	Families A&B&C&D: (SC673/(LandracexBTx406)), (SC757/(LandracexBTx406)), (SC1203/(LandracexBTx406)), (SC1038/(LandracexBTx406))	Height (plant height)	6	42432304	42588633	14
QHGHT6.33	Wang et al 2014a	IS8525/R931945-2-2	Height (plant height)	6	42487924	44141601	59
QHGHT6.31	Higgins et al 2014	Families A&B&C: (SC673/(LandracexBTx406)), (SC757/(LandracexBTx406)), (SC1203/(LandracexBTx406))	Height (plant height)	6	42546552	43953845	47
QHGHT6.32	Higgins et al 2014	Families A&B: (SC673/(LandracexBTx406)), (SC757/(LandracexBTx406))	Height (plant height)	6	42546557	43953851	47
QHGHT6.34	Higgins et al 2014	Families A&B&C&D&E: (SC673/(LandracexBTx406)), (SC757/(LandracexBTx406)), (SC1203/(LandracexBTx406)), (SC1038/(LandracexBTx406)), (SC991/(LandracexBTx406))	Height (plant height)	6	44000915	44150804	5
QHGHT6.35	Higgins et al 2014	Families A&B: (SC673/(LandracexBTx406)), (SC757/(LandracexBTx406))	Height (plant height)	6	44040292	44190181	4
QHGHT6.36	Higgins et al 2014	Families A&B&C&D&E: (SC673/(LandracexBTx406)), (SC757/(LandracexBTx406)), (SC1203/(LandracexBTx406)), (SC1038/(LandracexBTx406)), (SC991/(LandracexBTx406))	Height (plant height)	6	44040292	44190181	4
QHGHT6.37	Higgins et al 2014	FamilyB: SC757/(LandracexBTx406)	Height (plant height)	6	44048921	44198810	4
QHGHT6.38	Higgins et al 2014	Families A&B: (SC673/(LandracexBTx406)), (SC757/(LandracexBTx406))	Height (plant height)	6	44048921	44198810	4
QHGHT6.39	Higgins et al 2014	FamilyB: SC757/(LandracexBTx406)	Height (plant height)	6	44048921	44198810	4
QHGHT6.40	Higgins et al 2014	Families A&B: (SC673/(LandracexBTx406)), (SC757/(LandracexBTx406))	Height (plant height)	6	44048921	44198810	4
QHGHT6.41	Higgins et al 2014	FamilyA: SC673/(LandracexBTx406)	Height (plant height)	6	44071818	44221707	3
QHGHT6.42	Higgins et al 2014	Families A&B&C&D: (SC673/(LandracexBTx406)), (SC757/(LandracexBTx406)), (SC1203/(LandracexBTx406)), (SC1038/(LandracexBTx406))	Height (plant height)	6	44101059	44250948	3
QHGHT6.43	Higgins et al 2014	Families A&B&C: (SC673/(LandracexBTx406)), (SC757/(LandracexBTx406)), (SC1203/(LandracexBTx406))	Height (plant height)	6	44143574	44293463	5
QHGHT6.44	Higgins et al 2014	Families A&B&C&D: (SC673/(LandracexBTx406)), (SC757/(LandracexBTx406)), (SC1203/(LandracexBTx406)), (SC1038/(LandracexBTx406))	Height (plant height)	6	44143574	44293463	5
QHGHT6.45	Higgins et al 2014	Families A&B&C&D&E: (SC673/(LandracexBTx406)), (SC757/(LandracexBTx406)), (SC1203/(LandracexBTx406)), (SC1038/(LandracexBTx406)), (SC991/(LandracexBTx406))	Height (plant height)	6	44143574	44293463	5
QHGHT6.46	Higgins et al 2014	FamilyA: SC673/(LandracexBTx406)	Height (plant height)	6	44221903	44371792	8
QHGHT6.85	Bai et al 2017	BTx623/Rio	Height (plant height)	6	45960293	51853406	658
QHGHT6.48	Higgins et al 2014	FamilyD: SC1038/(LandracexBTx406)	Height (plant height)	6	46214118	46332211	9
QHGHT6.49	Higgins et al 2014	Families A&B&C&D: (SC673/(LandracexBTx406)), (SC757/(LandracexBTx406)), (SC1203/(LandracexBTx406)), (SC1038/(LandracexBTx406))	Height (plant height)	6	46214118	46332211	9
QHGHT6.50	Higgins et al 2014	Families A&B&C&D&E: (SC673/(LandracexBTx406)), (SC757/(LandracexBTx406)), (SC1203/(LandracexBTx406)), (SC1038/(LandracexBTx406)), (SC991/(LandracexBTx406))	Height (plant height)	6	46214118	46332211	9
QHGHT9.4	Brown et al 2006	BTx623/IS3620C	Height (plant height)	9	5170334	9939547	252
QHGHT9.3	Parh 2005	IS8525/R931945-2-2	Height (plant height)	9	5314377	8481223	196
QHGHT9.67	Zhao et al 2016	Sorghum Association Panel (SAP)	Height (plant height)	9	9358909	10256114	30
QHGHT9.5	Nagaraja Reddy et al 2013	M35-1/B35	Height (plant height)	9	9728902	47786722	491
QHGHT9.77	Bouchet et al 2017	Nested Association Mapping set US	Height (plant height)	9	45485998	47784516	108
QHGHT9.78	Bouchet et al 2017	Nested Association Mapping set US	Height (plant height)	9	48046343	48254490	26
QHGHT10.2	Pereira and Lee 1995	CK60/PI229828	Height (plant height)	10	5764036	50029802	993
QHGHT10.5	Shiringani et al 2010	M71/SS79	Height (plant height)	10	8583126	45572770	593
QHGHT10.6	Upadhyaya et al 2012b	mini-core set	Height (plant height)	10	50033186	50283194	8
QHGHT10.14	Mocoeur et al 2015	E-Tian/Ji2731	Height (plant height)	10	51869124	55707381	344
QHGHT10.8	Madhusudhana and Patil 2013	296B/IS18551	Height (plant height)	10	52365539	55703634	303
QHGHT10.10	Madhusudhana and Patil 2013	296B/IS18551	Height (plant height)	10	52394427	55701124	301
QHGHT10.9	Madhusudhana and Patil 2013	296B/IS18551	Height (plant height)	10	52719100	55676374	268
QHGHT10.7	Wang et al 2014a	R931945-2-2*2/S. bicolor subsp. verticilliflorum	Height (plant height)	10	53263791	53657419	28

## Sheet: FBY
QTL Id	Publication	Population	Trait Description	LG	Start	End (v2.1)	Genes Under QTL (v2.1)
QFBMS1.14	Wang et al 2016	Shihong137/L-Tian	Fresh biomass	1	71756279	73720929	193
QFBMS1.15	Wang et al 2016	Shihong137/L-Tian	Fresh biomass	1	71822281	73720929	186
QFBMS1.16	Wang et al 2016	Shihong137/L-Tian	Fresh biomass	1	72468151	73720929	116
QFBMS6.1	Wang et al 2014b	Shihong137/L-Tian	Fresh biomass	6	48594602	51896785	408

## Sheet: JUC
QTL Id	Publication	Population	Trait Description	LG	Start	End (v2.1)	Genes Under QTL (v2.1)
QJYLD1.1	Guan et al 2011	Shihong137/L-Tian	Juice yield	1	15245706	20274294	380
QJYLD6.6	Mace and Jordan 2010		Juice yield	6	49012104	51837481	349
QJYLD6.1	Mocoeur et al 2015	E-Tian/Ji2731	Juice yield	6	49694672	51838046	265
QJYLD6.2	Burks et al 2015	Sweet sorghum diversity panel (n=252)	Juice yield	6	50676920	51831580	134
QJYLD6.4	Burks et al 2015	Sweet sorghum diversity panel (n=252)	Juice yield	6	50676920	51831580	134
QJYLD6.3	Burks et al 2015	Sweet sorghum diversity panel (n=252)	Juice yield	6	50679556	51831621	134
QJYLD6.5	Burks et al 2015	Sweet sorghum diversity panel (n=252)	Juice yield	6	50679556	51831621	134

## Sheet: BRX
QTL Id	Publication	Population	Trait Description	LG	Start	End (v2.1)	Genes Under QTL (v2.1)
QBRIX1.1	Felderhoff et al 2012	BTx3197/Rio	Brix	1	14612158	24325006	637
QBRIX1.2	Felderhoff et al 2012	BTx3197/Rio	Brix	1	23755018	47278283	431
QBRIX1.3	Felderhoff et al 2012	BTx3197/Rio	Brix	1	24020068	50102677	569
QBRIX1.4	Shiringani et al 2010	M71/SS79	Brix	1	46144491	51629854	291
QBRIX1.5	Guan et al 2011	Shihong137/L-Tian	Brix	1	47825514	51512576	230
QBRIX1.6	Felderhoff et al 2012	BTx3197/Rio	Brix	1	62722387	67215178	530
QBRIX1.7	Lv et al 2013	Diverse set	Brix	1	68812014	69681973	94
QBRIX1.8	Lv et al 2013	Diverse set	Brix	1	68812014	69681973	94
QBRIX2.1	Shiringani et al 2010	M71/SS79	Brix	2	10082815	12430947	86
QBRIX2.8	Wang et al 2016	Shihong137/L-Tian	Brix	2	14121979	55958405	635
QBRIX2.7	Wang et al 2016	Shihong137/L-Tian	Brix	2	14185878	55441654	601
QBRIX2.9	Wang et al 2016	Shihong137/L-Tian	Brix	2	14195379	55002088	584
QBRIX2.2	Guan et al 2011	Shihong137/L-Tian	Brix	2	58537757	58877406	29
QBRIX2.3	Shiringani et al 2010	M71/SS79	Brix	2	61568357	61672175	7
QBRIX2.4	Felderhoff et al 2012	BTx3197/Rio	Brix	2	71064060	75930573	667
QBRIX2.6	Felderhoff et al 2012	BTx3197/Rio	Brix	2	74414717	76142981	228
QBRIX2.5	Felderhoff et al 2012	BTx3197/Rio	Brix	2	74685315	76088902	195
QBRIX3.1	Guan et al 2011	Shihong137/L-Tian	Brix	3	11253444	14028596	180
QBRIX3.3	Felderhoff et al 2012	BTx3197/Rio	Brix	3	52068518	55987286	278
QBRIX3.2	Felderhoff et al 2012	BTx3197/Rio	Brix	3	54144570	55550038	109
QBRIX3.5	Felderhoff et al 2012	BTx3197/Rio	Brix	3	55622987	57048012	101
QBRIX3.4	Felderhoff et al 2012	BTx3197/Rio	Brix	3	55659917	56697210	76
QBRIX3.6	Murray et al 2008a	BTx623/Rio	Brix	3	55863217	56503828	51
QBRIX3.7	Harris-Shultz et al 2015	HoneyDrip/Collier	Brix	3	64183154	69904668	734
QBRIX4.1	Shiringani et al 2010	M71/SS79	Brix	4	11750229	48914965	420
QBRIX4.2	Felderhoff et al 2012	BTx3197/Rio	Brix	4	51223175	56244071	512
QBRIX4.5	Mocoeur et al 2015	E-Tian/Ji2731	Brix	4	51326260	56245219	506
QBRIX4.3	Felderhoff et al 2012	BTx3197/Rio	Brix	4	54344650	60073631	628
QBRIX4.4	Shiringani et al 2010	M71/SS79	Brix	4	61794342	62404661	70
QBRIX5.1	Ritter et al 2008	R9188/R9403463-2-1	Brix	5	1123992	1997412	96
QBRIX6.5	Mocoeur et al 2015	E-Tian/Ji2731	Brix	6	1553071	2941800	70
QBRIX6.6	Bai et al 2017	BTx623/Rio	Brix	6	27158154	44696579	333
QBRIX6.7	Bai et al 2017	BTx623/Rio	Brix	6	38147892	45883401	292
QBRIX6.1	Ritter et al 2008	R9188/R9403463-2-1	Brix	6	41719125	44118639	91
QBRIX6.2	Felderhoff et al 2012	BTx3197/Rio	Brix	6	48090626	51886297	468
QBRIX6.3	Shiringani et al 2010	M71/SS79	Brix	6	51850009	53140940	169
QBRIX6.4	Shiringani et al 2010	M71/SS79	Brix	6	60765314	61093380	52
QBRIX7.1	Shiringani et al 2010	M71/SS79	Brix	7	4066100	7419570	268
QBRIX7.4	Bai et al 2017	BTx623/Rio	Brix	7	56614053	57001615	25
QBRIX7.2	Guan et al 2011	Shihong137/L-Tian	Brix	7	58070558	58277957	19
QBRIX7.3	Murray et al 2008a	BTx623/Rio	Brix	7	58237324	58277540	3
QBRIX8.2	Mocoeur et al 2015	E-Tian/Ji2731	Brix	8	703679	2246321	158
QBRIX8.1	Shiringani et al 2010	M71/SS79	Brix	8	45981618	49436556	188
QBRIX9.1	Shiringani et al 2010	M71/SS79	Brix	9	53006418	56976816	545
QBRIX9.2	Felderhoff et al 2012	BTx3197/Rio	Brix	9	53902920	57988823	579
QBRIX9.3	Felderhoff et al 2012	BTx3197/Rio	Brix	9	54207363	58013279	541
QBRIX10.2	Felderhoff et al 2012	BTx3197/Rio	Brix	10	8994220	51727829	806
QBRIX10.1	Shiringani et al 2010	M71/SS79	Brix	10	9159321	41649453	461

## Sheet: SUC
QTL Id	Publication	Population	Trait Description	LG	Start	End (v2.1)	Genes Under QTL (v2.1)
QSUCR1.1	Shiringani et al 2010	M71/SS79	Sucrose content	1	15656455	24120158	537
QSUCR1.2	Ritter et al 2008	R9188/R9403463-2-1	Sucrose content	1	50107777	53688608	269
QSUCR2.1	Shiringani et al 2010	M71/SS79	Sucrose content	2	60291896	61629807	147
QSUCR3.1	Murray et al 2008a	BTx623/Rio	Sucrose content	3	55682863	57051817	93
QSUCR4.1	Shiringani et al 2010	M71/SS79	Sucrose content	4	11129905	44383367	337
QSUCR4.2	Shiringani et al 2010	M71/SS79	Sucrose content	4	61649351	62600493	112
QSUCR5.1	Ritter et al 2008	R9188/R9403463-2-1	Sucrose content	5	1279010	1960623	71
QSUCR6.2	Ritter et al 2008	R9188/R9403463-2-1	Sucrose content	6	41898269	44075875	86
QSUCR6.1	Ritter et al 2008	R9188/R9403463-2-1	Sucrose content	6	42336602	43971240	69
QSUCR6.3	Shiringani et al 2010	M71/SS79	Sucrose content	6	58584662	61004421	327
QSUCR7.2	Ritter et al 2008	R9188/R9403463-2-1	Sucrose content	7	2641218	3353235	79
QSUCR8.2	Ritter et al 2008	R9188/R9403463-2-1	Sucrose content	8	50089153	50808703	54
QSUCR10.1	Shiringani et al 2010	M71/SS79	Sucrose content	10	8733944	49295070	702
QSUCR10.2	Ritter et al 2008	R9188/R9403463-2-1	Sucrose content	10	49013627	50181330	50
QSUCR10.3	Ritter et al 2008	R9188/R9403463-2-1	Sucrose content	10	58216072	59900421	217

## Sheet: RSU
QTL Id	Publication	Population	Trait Description	LG	Start	End (v2.1)	Genes Under QTL (v2.1)
QGLUC1.1	Shiringani et al 2010	M71/SS79	Glucose content	1	70148536	71269760	132
QGLUC1.2	Wang et al 2013a	mini-core set	Glucose content	1	72926369	73720929	63
QGLUC2.1	Murray et al 2008a	BTx623/Rio	Glucose content	2	1880229	3809645	188
QGLUC2.2	Shiringani et al 2010	M71/SS79	Glucose content	2	64913234	68050280	408
QGLUC2.3	Wang et al 2011	mini-core set	Glucose content	2	65070418	65567818	65
QGLUC2.4	Wang et al 2011	mini-core set	Glucose content	2	65070418	65567818	65
QGLUC3.1	Shiringani et al 2010	M71/SS79	Glucose content	3	6149594	10077700	396
QGLUC3.2	Shiringani et al 2010	M71/SS79	Glucose content	3	53802922	55892092	156
QGLUC3.3	Wang et al 2013a	mini-core set	Glucose content	3	61626742	62371686	97
QGLUC4.1	Wang et al 2013a	mini-core set	Glucose content	4	4356117	4410658	6
QGLUC4.2	Wang et al 2011	mini-core set	Glucose content	4	64390582	64392284	0
QGLUC4.3	Wang et al 2011	mini-core set	Glucose content	4	64390582	64392284	0
QGLUC5.1	Murray et al 2008a	BTx623/Rio	Glucose content	5	7221007	10938968	177
QGLUC6.1	Shiringani et al 2010	M71/SS79	Glucose content	6	60704827	62177402	192
QGLUC7.1	Shiringani et al 2010	M71/SS79	Glucose content	7	3403276	4473689	76
QGLUC7.2	Shiringani et al 2010	M71/SS79	Glucose content	7	7072634	9095213	129
QGLUC7.3	Shiringani et al 2010	M71/SS79	Glucose content	7	60443397	62328158	214
QGLUC8.1	Wang et al 2013a	mini-core set	Glucose content	8	8264569	45857459	508
QGLUC9.1	Shiringani et al 2010	M71/SS79	Glucose content	9	3010898	5277793	186
QGLUC9.3	Wang et al 2013a	mini-core set	Glucose content	9	6908466	7114356	12
QGLUC9.4	Wang et al 2013a	mini-core set	Glucose content	9	52572878	52743428	24
QGLUC9.2	Shiringani et al 2010	M71/SS79	Glucose content	9	58015331	59414506	171
QGLUC10.1	Wang et al 2013a	mini-core set	Glucose content	10	1654970	1680046	3

## Sheet: FIB
QTL Id	Publication	Population	Trait Description	LG	Start	End (v2.1)	Genes Under QTL (v2.1)
QLNDF1.1	Murray et al 2008b	BTx623/Rio	Leaf neutral detergent fibre	1	68138118	70188258	240
QSADF1.1	Shiringani & Friedt 2011	SS79/M71	Acid detergent fibre	1	70166474	71205611	125
QSADF2.1	Shiringani & Friedt 2011	SS79/M71	Acid detergent fibre	2	60408846	61568906	126
QSNDF2.1	Shiringani & Friedt 2011	SS79/M71	Neutral detergent fibre	2	61578305	62581326	108
QLNDF3.1	Murray et al 2008b	BTx623/Rio	Leaf neutral detergent fibre	3	54076233	55873976	138
QSNDF3.1	Shiringani & Friedt 2011	SS79/M71	Neutral detergent fibre	3	54553425	55695290	98
QSNDF3.2	Murray et al 2008b	BTx623/Rio	Neutral detergent fibre	3	54980495	55652558	58
QSADF4.1	Shiringani & Friedt 2011	SS79/M71	Acid detergent fibre	4	61403623	62191686	85
QSADF6.1	Shiringani & Friedt 2011	SS79/M71	Acid detergent fibre	6	51842778	52730422	124
QSNDF6.1	Shiringani & Friedt 2011	SS79/M71	Neutral detergent fibre	6	53578461	54402895	108
QSNDF6.2	Shiringani & Friedt 2011	SS79/M71	Neutral detergent fibre	6	57561143	58358167	117
QSNDF6.3	Shiringani & Friedt 2011	SS79/M71	Neutral detergent fibre	6	60846089	62177402	171
QSADF6.2	Shiringani & Friedt 2011	SS79/M71	Acid detergent fibre	6	61015062	62177402	146
QSNDF8.1	Murray et al 2008b	BTx623/Rio	Neutral detergent fibre	8	46629644	49458134	173
QSADF9.1	Shiringani & Friedt 2011	SS79/M71	Acid detergent fibre	9	3968691	5306181	111
